# Supplementary material for: Understanding the chemical dynamics of the reactions of dicarbon with 1-butyne, 2-butyne, and 1,2-butadiene – toward the formation of resonantly stabilized free radicals
Source: Royal Society of Chemistry journal article supplement (doi:10.1039/c4cp00639a), 2014-01-01
Supplement: c4cp00639a1.pdf [file c4cp00639a1.pdf]

## Electronic Supplementary Information (ESI)

for

### Understanding the Chemical Dynamics of the Reactions of Dicarbon with 1-Butyne, 2-Butyne, and 1,2-Butadiene – Toward the Formation of Resonantly Stabilized Free Radicals

by

Dorian S. N. Parker, S. Maity, Beni B. Dangi, Ralf I. Kaiser\*

*Department of Chemistry, University of Hawai'i at Manoa, Honolulu, HI 96822*

Alexander Landera, A. M. Mebel\*

*Department of Chemistry & Biochemistry, Florida International University, Miami, FL 33199*

**Table S1.** Rate constants for various individual unimolecular reaction steps calculated using RRKM theory under single-collision conditions at different collision energies.

(a)  $C_2(X^1\Sigma_g^+) + 2\text{-butyne}$ , Figure 4(a). RRKM calculations were not performed since product  $p1_{2b}$  is the only  $C_6H_5$  isomer able to be formed on the singlet surface.

(b)  $C_2(a^3\Pi_u) + 2\text{-butyne}$ , Figure 4(b).

| From                    | To                      | Collision Energy, $\text{kJ mol}^{-1}$ |          |          |          |          |          |          |
|-------------------------|-------------------------|----------------------------------------|----------|----------|----------|----------|----------|----------|
|                         |                         | 0                                      | 5        | 10       | 15       | 20       | 26.4     | 30       |
| <b>i4<sub>2b</sub></b>  | <b>i5<sub>2b</sub></b>  | 3.10E+11                               | 3.45E+11 | 3.82E+11 | 4.21E+11 | 4.60E+11 | 5.20E+11 | 5.53E+11 |
| <b>i5<sub>2b</sub></b>  | <b>i4<sub>2b</sub></b>  | 3.60E+10                               | 4.05E+10 | 4.50E+10 | 4.99E+10 | 5.52E+10 | 6.24E+10 | 6.66E+10 |
| <b>i4<sub>2b</sub></b>  | <b>i6<sub>2b</sub></b>  | 1.93E+08                               | 2.55E+08 | 3.30E+08 | 4.22E+08 | 5.33E+08 | 7.06E+08 | 8.21E+08 |
| <b>i6<sub>2b</sub></b>  | <b>i4<sub>2b</sub></b>  | 1.14E+09                               | 1.45E+09 | 1.82E+09 | 2.26E+09 | 2.76E+09 | 3.52E+09 | 4.01E+09 |
| <b>i5<sub>2b</sub></b>  | <b>i9<sub>2b</sub></b>  | 0.00E+00                               | 0.00E+00 | 2.06E+00 | 8.38E+00 | 2.86E+01 | 1.11E+02 | 2.18E+02 |
| <b>i9<sub>2b</sub></b>  | <b>i5<sub>2b</sub></b>  | 0.00E+00                               | 0.00E+00 | 8.37E-05 | 3.83E-04 | 1.47E-03 | 6.58E-03 | 1.40E-02 |
| <b>i5<sub>2b</sub></b>  | <b>i10<sub>2b</sub></b> | 2.81E+07                               | 3.57E+07 | 4.49E+07 | 5.59E+07 | 6.88E+07 | 8.86E+07 | 1.01E+08 |
| <b>i10<sub>2b</sub></b> | <b>i5<sub>2b</sub></b>  | 4.51E+02                               | 6.55E+02 | 9.39E+02 | 1.33E+03 | 1.85E+03 | 2.77E+03 | 3.46E+03 |
| <b>i5<sub>2b</sub></b>  | <b>p2<sub>2b</sub></b>  | 5.60E+06                               | 1.02E+07 | 1.78E+07 | 2.96E+07 | 4.75E+07 | 8.32E+07 | 1.12E+08 |
| <b>i6<sub>2b</sub></b>  | <b>i7<sub>2b</sub></b>  | 4.83E+08                               | 6.43E+08 | 8.42E+08 | 1.08E+09 | 1.37E+09 | 1.83E+09 | 2.12E+09 |
| <b>i7<sub>2b</sub></b>  | <b>i6<sub>2b</sub></b>  | 1.09E+06                               | 1.56E+06 | 2.20E+06 | 3.02E+06 | 4.10E+06 | 5.91E+06 | 7.19E+06 |
| <b>i7<sub>2b</sub></b>  | <b>i8<sub>2b</sub></b>  | 4.66E+09                               | 5.39E+09 | 6.19E+09 | 7.07E+09 | 8.03E+09 | 9.39E+09 | 1.02E+10 |
| <b>i8<sub>2b</sub></b>  | <b>i7<sub>2b</sub></b>  | 1.08E+09                               | 1.26E+09 | 1.47E+09 | 1.69E+09 | 1.94E+09 | 2.31E+09 | 2.53E+09 |
| <b>i8<sub>2b</sub></b>  | <b>p1<sub>2b</sub></b>  | 5.73E+11                               | 6.54E+11 | 7.44E+11 | 8.42E+11 | 9.49E+11 | 1.10E+12 | 1.19E+12 |
| <b>i9<sub>2b</sub></b>  | <b>p3<sub>2b</sub></b>  | 3.99E+09                               | 4.75E+09 | 5.62E+09 | 6.61E+09 | 7.75E+09 | 9.44E+09 | 1.05E+10 |

|                         |                        |          |          |          |          |          |          |          |
|-------------------------|------------------------|----------|----------|----------|----------|----------|----------|----------|
| <b>i9<sub>2b</sub></b>  | <b>p5<sub>2b</sub></b> | 5.73E+08 | 7.22E+08 | 9.04E+08 | 1.12E+09 | 1.39E+09 | 1.80E+09 | 2.07E+09 |
| <b>i10<sub>2b</sub></b> | <b>p3<sub>2b</sub></b> | 5.37E+07 | 6.78E+07 | 8.48E+07 | 1.05E+08 | 1.30E+08 | 1.69E+08 | 1.95E+08 |
| <b>i10<sub>2b</sub></b> | <b>p4<sub>2b</sub></b> | 6.52E+10 | 7.57E+10 | 8.74E+10 | 1.01E+11 | 1.15E+11 | 1.37E+11 | 1.50E+11 |

(c) C<sub>2</sub>(X<sup>1</sup>Σ<sub>g</sub><sup>+</sup>) + 1-butyne, Figure 5(a).

| From                   | To                     | Collision Energy, kJ mol <sup>-1</sup> |          |          |          |          |          |
|------------------------|------------------------|----------------------------------------|----------|----------|----------|----------|----------|
|                        |                        | 0                                      | 4.18     | 8.37     | 12.55    | 16.74    | 22.00    |
| <b>i2<sub>1b</sub></b> | <b>i3<sub>1b</sub></b> | 6.22E+10                               | 6.69E+10 | 7.18E+10 | 7.69E+10 | 8.24E+10 | 8.95E+10 |
| <b>i3<sub>1b</sub></b> | <b>i2<sub>1b</sub></b> | 5.87E+04                               | 6.91E+04 | 8.19E+04 | 9.62E+04 | 1.13E+05 | 1.35E+05 |
| <b>i3<sub>1b</sub></b> | <b>p2<sub>1b</sub></b> | 1.59E+10                               | 1.69E+10 | 1.80E+10 | 1.91E+10 | 2.02E+10 | 2.16E+10 |
| <b>i3<sub>1b</sub></b> | <b>p1<sub>1b</sub></b> | 9.55E+08                               | 1.04E+09 | 1.14E+09 | 1.24E+09 | 1.35E+09 | 1.50E+09 |
| <b>i3<sub>1b</sub></b> | <b>p3<sub>1b</sub></b> | 1.13E+07                               | 1.31E+07 | 1.50E+07 | 1.73E+07 | 1.99E+07 | 2.35E+08 |

(d) C<sub>2</sub>(a<sup>3</sup>Π<sub>u</sub>) + 1-butyne, Figure 5(b).

| From                    | To                      | Collision Energy, kJ mol <sup>-1</sup> |          |          |          |          |          |
|-------------------------|-------------------------|----------------------------------------|----------|----------|----------|----------|----------|
|                         |                         | 0                                      | 4.18     | 8.37     | 12.55    | 16.74    | 22.00    |
| <b>i8<sub>1b</sub></b>  | <b>i11<sub>1b</sub></b> | 4.39E+07                               | 5.09E+07 | 5.87E+07 | 6.73E+07 | 7.69E+07 | 9.03E+07 |
| <b>i11<sub>1b</sub></b> | <b>i8<sub>1b</sub></b>  | 1.49E+04                               | 1.85E+04 | 2.28E+04 | 2.78E+04 | 3.39E+04 | 4.30E+04 |
| <b>i8<sub>1b</sub></b>  | <b>i6<sub>1b</sub></b>  | 9.91E+02                               | 1.55E+03 | 2.32E+03 | 3.40E+03 | 4.87E+03 | 7.45E+03 |
| <b>i11<sub>1b</sub></b> | <b>i12<sub>1b</sub></b> | 2.96E+09                               | 3.06E+09 | 3.16E+09 | 3.26E+09 | 3.36E+09 | 3.49E+09 |
| <b>i12<sub>1b</sub></b> | <b>i11<sub>1b</sub></b> | 7.34E+10                               | 7.93E+10 | 8.55E+10 | 9.21E+10 | 9.90E+10 | 1.08E+11 |
| <b>i11<sub>1b</sub></b> | <b>i10<sub>1b</sub></b> | 2.86E+12                               | 2.87E+12 | 2.88E+12 | 2.89E+12 | 2.91E+12 | 2.91E+12 |
| <b>i10<sub>1b</sub></b> | <b>i11<sub>1b</sub></b> | 5.19E+12                               | 5.21E+12 | 5.23E+12 | 5.25E+12 | 5.27E+12 | 5.29E+12 |
| <b>i12<sub>1b</sub></b> | <b>i16<sub>1b</sub></b> | 1.70E+09                               | 1.87E+09 | 2.05E+09 | 2.24E+09 | 2.47E+09 | 2.74E+09 |
| <b>i16<sub>1b</sub></b> | <b>i12<sub>1b</sub></b> | 3.75E+06                               | 4.30E+06 | 4.91E+06 | 5.61E+06 | 6.38E+06 | 7.48E+06 |
| <b>i16<sub>1b</sub></b> | <b>i17<sub>1b</sub></b> | 3.47E+09                               | 3.70E+09 | 3.95E+09 | 4.21E+09 | 4.48E+09 | 4.84E+09 |
| <b>i17<sub>1b</sub></b> | <b>i16<sub>1b</sub></b> | 2.83E+09                               | 3.02E+09 | 3.23E+09 | 3.45E+09 | 3.68E+09 | 3.99E+09 |
| <b>i16<sub>1b</sub></b> | <b>p5<sub>1b</sub></b>  | 1.56E+11                               | 1.63E+11 | 1.70E+11 | 1.77E+11 | 1.84E+11 | 1.93E+11 |
| <b>i17<sub>1b</sub></b> | <b>i18<sub>1b</sub></b> | 1.82E+13                               | 1.81E+13 | 1.80E+13 | 1.79E+13 | 2.11E+13 | 2.21E+13 |
| <b>i18<sub>1b</sub></b> | <b>i17<sub>1b</sub></b> | 4.84E+10                               | 4.99E+10 | 5.17E+10 | 5.34E+10 | 5.51E+10 | 5.73E+10 |
| <b>i17<sub>1b</sub></b> | <b>p5<sub>1b</sub></b>  | 1.66E+11                               | 1.73E+11 | 1.81E+11 | 1.88E+11 | 1.96E+11 | 2.06E+11 |
| <b>i18<sub>1b</sub></b> | <b>i19<sub>1b</sub></b> | 5.88E+08                               | 6.04E+08 | 6.20E+08 | 6.36E+08 | 6.53E+08 | 6.73E+08 |
| <b>i19<sub>1b</sub></b> | <b>i18<sub>1b</sub></b> | 4.15E+12                               | 4.20E+12 | 4.25E+12 | 4.30E+12 | 4.34E+12 | 4.40E+12 |
| <b>i18<sub>1b</sub></b> | <b>p5<sub>1b</sub></b>  | 2.07E+08                               | 2.16E+08 | 2.25E+08 | 2.35E+08 | 2.44E+08 | 2.57E+08 |
| <b>i19<sub>1b</sub></b> | <b>p6<sub>1b</sub></b>  | 3.55E+06                               | 4.45E+06 | 5.55E+06 | 6.88E+06 | 8.49E+06 | 1.10E+07 |
| <b>i10<sub>1b</sub></b> | <b>i9<sub>1b</sub></b>  | 1.82E+12                               | 1.83E+12 | 1.83E+12 | 1.83E+12 | 1.84E+12 | 1.84E+12 |
| <b>i9<sub>1b</sub></b>  | <b>i10<sub>1b</sub></b> | 3.12E+12                               | 3.13E+12 | 3.14E+12 | 3.15E+12 | 3.16E+12 | 3.18E+12 |
| <b>i9<sub>1b</sub></b>  | <b>i7<sub>1b</sub></b>  | 2.78E+08                               | 3.06E+08 | 3.36E+08 | 3.68E+08 | 4.03E+08 | 4.49E+08 |
| <b>i7<sub>1b</sub></b>  | <b>i9<sub>1b</sub></b>  | 5.40E+11                               | 5.49E+11 | 5.59E+11 | 5.68E+11 | 5.78E+11 | 5.89E+11 |
| <b>i9<sub>1b</sub></b>  | <b>i13<sub>1b</sub></b> | 3.26E+07                               | 3.87E+07 | 4.58E+07 | 5.39E+07 | 6.32E+07 | 7.66E+07 |

|                         |                         |          |          |          |          |          |          |
|-------------------------|-------------------------|----------|----------|----------|----------|----------|----------|
| <b>i13<sub>1b</sub></b> | <b>i9<sub>1b</sub></b>  | 6.23E+04 | 7.79E+04 | 9.69E+04 | 1.20E+05 | 1.48E+05 | 1.90E+05 |
| <b>i9<sub>1b</sub></b>  | <b>p3<sub>1b</sub></b>  | 5.84E+08 | 7.18E+08 | 8.77E+08 | 1.07E+09 | 1.29E+09 | 1.62E+09 |
| <b>i7<sub>1b</sub></b>  | <b>i6<sub>1b</sub></b>  | 2.08E+03 | 3.18E+03 | 4.73E+03 | 6.86E+03 | 9.70E+03 | 1.47E+04 |
| <b>i6<sub>1b</sub></b>  | <b>i7<sub>1b</sub></b>  | 3.09E+06 | 4.35E+06 | 5.96E+06 | 8.02E+06 | 1.06E+07 | 1.46E+07 |
| <b>i7<sub>1b</sub></b>  | <b>p2<sub>1b</sub></b>  | 2.30E+12 | 2.49E+12 | 2.67E+12 | 2.86E+12 | 3.06E+12 | 3.33E+12 |
| <b>i7<sub>1b</sub></b>  | <b>p1<sub>1b</sub></b>  | 2.54E+11 | 2.84E+11 | 3.15E+11 | 3.49E+11 | 3.86E+11 | 4.35E+11 |
| <b>i6<sub>1b</sub></b>  | <b>i5<sub>1b</sub></b>  | 2.11E+10 | 2.53E+10 | 3.00E+10 | 3.52E+10 | 4.10E+10 | 4.91E+10 |
| <b>i5<sub>1b</sub></b>  | <b>i6<sub>1b</sub></b>  | 5.56E+07 | 7.06E+07 | 9.11E+07 | 1.15E+08 | 1.43E+08 | 1.85E+08 |
| <b>i5<sub>1b</sub></b>  | <b>i4<sub>1b</sub></b>  | 3.52E+10 | 3.88E+10 | 4.26E+10 | 4.67E+10 | 5.09E+10 | 5.66E+10 |
| <b>i4<sub>1b</sub></b>  | <b>i5<sub>1b</sub></b>  | 6.04E+10 | 6.70E+10 | 7.33E+10 | 8.03E+10 | 8.77E+10 | 9.76E+10 |
| <b>i13<sub>1b</sub></b> | <b>i4<sub>1b</sub></b>  | 1.63E+12 | 1.63E+12 | 1.63E+12 | 1.63E+12 | 1.63E+12 | 1.63E+12 |
| <b>i14<sub>1b</sub></b> | <b>i13<sub>1b</sub></b> | 2.57E+12 | 2.58E+12 | 2.58E+12 | 2.59E+12 | 2.60E+12 | 2.60E+12 |
| <b>i13<sub>1b</sub></b> | <b>p8<sub>1b</sub></b>  | 6.85E+06 | 8.17E+06 | 9.70E+06 | 1.15E+07 | 1.35E+07 | 1.68E+07 |
| <b>i13<sub>1b</sub></b> | <b>p10<sub>1b</sub></b> | 3.82E+07 | 4.42E+07 | 5.10E+07 | 5.88E+07 | 6.73E+07 | 7.97E+07 |
| <b>i14<sub>1b</sub></b> | <b>i15<sub>1b</sub></b> | 3.95E+11 | 4.04E+11 | 4.13E+11 | 4.23E+11 | 4.32E+11 | 4.44E+11 |
| <b>i15<sub>1b</sub></b> | <b>i14<sub>1b</sub></b> | 3.67E+11 | 3.76E+11 | 3.84E+11 | 3.94E+11 | 4.03E+11 | 4.14E+11 |
| <b>i15<sub>1b</sub></b> | <b>p7<sub>1b</sub></b>  | 3.44E+07 | 3.99E+07 | 4.62E+07 | 5.33E+07 | 6.13E+07 | 7.29E+07 |
| <b>i15<sub>1b</sub></b> | <b>p9<sub>1b</sub></b>  | 8.39E+06 | 9.98E+06 | 1.19E+07 | 1.41E+07 | 1.66E+07 | 2.03E+07 |

(e)  $C_2(X^1\Sigma_g^+) + 1,2\text{-butadiene}$ , Figure 6(a).

| From                   | To                     | Collision Energy, $\text{kJ mol}^{-1}$ |          |          |          |          |          |
|------------------------|------------------------|----------------------------------------|----------|----------|----------|----------|----------|
|                        |                        | 0                                      | 4.18     | 8.37     | 12.55    | 16.74    | 22.00    |
| <b>i1<sub>bd</sub></b> | <b>i2<sub>bd</sub></b> | 3.88E+10                               | 4.07E+10 | 4.25E+10 | 4.43E+10 | 4.62E+10 | 4.84E+10 |
| <b>i2<sub>bd</sub></b> | <b>i1<sub>bd</sub></b> | 3.90E+06                               | 4.30E+06 | 4.74E+06 | 5.20E+06 | 5.71E+06 | 6.37E+06 |
| <b>i2<sub>bd</sub></b> | <b>p1<sub>bd</sub></b> | 3.13E+08                               | 3.42E+08 | 3.73E+08 | 4.07E+08 | 4.43E+08 | 4.92E+08 |
| <b>i2<sub>bd</sub></b> | <b>p2<sub>bd</sub></b> | 4.24E+09                               | 4.57E+09 | 4.92E+09 | 5.29E+09 | 5.68E+09 | 6.21E+09 |
| <b>i2<sub>bd</sub></b> | <b>p3<sub>bd</sub></b> | 4.09E+08                               | 4.49E+08 | 4.92E+08 | 5.39E+08 | 5.90E+08 | 6.59E+08 |
| <b>i2<sub>bd</sub></b> | <b>p4<sub>bd</sub></b> | 4.70E+08                               | 5.13E+08 | 5.60E+08 | 6.11E+08 | 6.65E+08 | 7.39E+08 |

(f)  $C_2(a^3\Pi_u) + 1,2\text{-butadiene}$ , Figure 6(b).

| From                    | To                      | Collision Energy, $\text{kJ mol}^{-1}$ |          |          |          |          |          |
|-------------------------|-------------------------|----------------------------------------|----------|----------|----------|----------|----------|
|                         |                         | 0                                      | 4.18     | 8.37     | 12.55    | 16.74    | 22.00    |
| <b>i6<sub>bd</sub></b>  | <b>i8<sub>bd</sub></b>  | 5.16E+10                               | 5.62E+10 | 6.09E+10 | 6.57E+10 | 7.07E+10 | 7.74E+10 |
| <b>i8<sub>bd</sub></b>  | <b>i6<sub>bd</sub></b>  | 3.95E+03                               | 5.18E+03 | 6.73E+03 | 8.68E+03 | 1.11E+04 | 1.50E+04 |
| <b>i6<sub>bd</sub></b>  | <b>i5<sub>bd</sub></b>  | 1.73E+09                               | 2.02E+09 | 2.34E+09 | 2.69E+09 | 3.06E+09 | 3.58E+09 |
| <b>i5<sub>bd</sub></b>  | <b>i6<sub>bd</sub></b>  | 2.48E+07                               | 3.27E+07 | 4.25E+07 | 5.47E+07 | 6.96E+07 | 9.32E+07 |
| <b>i5<sub>bd</sub></b>  | <b>i17<sub>bd</sub></b> | 4.34E+10                               | 4.83E+10 | 5.36E+10 | 5.93E+10 | 6.52E+10 | 7.37E+10 |
| <b>i17<sub>bd</sub></b> | <b>i5<sub>bd</sub></b>  | 1.60E+04                               | 1.96E+04 | 2.39E+04 | 2.89E+04 | 3.48E+04 | 4.38E+04 |
| <b>i6<sub>bd</sub></b>  | <b>p6<sub>bd</sub></b>  | 4.75E+02                               | 2.39E+03 | 8.71E+03 | 2.56E+04 | 6.48E+04 | 1.78E+05 |
| <b>i6<sub>bd</sub></b>  | <b>p5<sub>bd</sub></b>  | 2.60E+04                               | 9.21E+04 | 2.66E+05 | 6.63E+05 | 1.49E+06 | 3.64E+06 |

|                         |                         |          |          |          |          |          |          |
|-------------------------|-------------------------|----------|----------|----------|----------|----------|----------|
| <b>i8<sub>bd</sub></b>  | <b>i11<sub>bd</sub></b> | 5.45E+08 | 5.76E+08 | 6.09E+08 | 6.42E+08 | 6.77E+08 | 7.22E+08 |
| <b>i11<sub>bd</sub></b> | <b>i8<sub>bd</sub></b>  | 3.81E+10 | 4.09E+10 | 4.39E+10 | 4.72E+10 | 5.05E+10 | 5.50E+10 |
| <b>i8<sub>bd</sub></b>  | <b>i14<sub>bd</sub></b> | 1.75E+08 | 1.93E+08 | 2.11E+08 | 2.32E+08 | 2.54E+08 | 2.83E+08 |
| <b>i14<sub>bd</sub></b> | <b>i8<sub>bd</sub></b>  | 4.63E+09 | 5.17E+09 | 5.74E+09 | 6.37E+09 | 7.06E+09 | 7.99E+09 |
| <b>i8<sub>bd</sub></b>  | <b>p10<sub>bd</sub></b> | 2.41E+09 | 2.75E+09 | 3.12E+09 | 3.54E+09 | 3.99E+09 | 4.64E+09 |
| <b>i8<sub>bd</sub></b>  | <b>p8<sub>bd</sub></b>  | 5.62E+09 | 6.48E+09 | 7.45E+09 | 8.53E+09 | 9.74E+09 | 1.15E+10 |
| <b>i11<sub>bd</sub></b> | <b>i12<sub>bd</sub></b> | 2.01E+10 | 2.23E+10 | 2.46E+10 | 2.71E+10 | 2.98E+10 | 3.36E+09 |
| <b>i12<sub>bd</sub></b> | <b>i11<sub>bd</sub></b> | 1.75E+06 | 2.02E+06 | 2.32E+06 | 2.66E+06 | 3.04E+06 | 3.59E+06 |
| <b>i11<sub>bd</sub></b> | <b>i10<sub>bd</sub></b> | 2.81E+03 | 3.88E+03 | 5.25E+03 | 7.07E+03 | 9.41E+03 | 1.33E+04 |
| <b>i10<sub>bd</sub></b> | <b>i11<sub>bd</sub></b> | 3.62E+05 | 4.71E+05 | 6.07E+05 | 7.73E+05 | 9.79E+05 | 1.30E+06 |
| <b>i12<sub>bd</sub></b> | <b>i15<sub>bd</sub></b> | 3.59E+06 | 4.12E+06 | 4.71E+06 | 5.38E+06 | 6.12E+06 | 7.19E+06 |
| <b>i15<sub>bd</sub></b> | <b>i12<sub>bd</sub></b> | 2.40E+09 | 3.62E+09 | 3.98E+09 | 4.36E+09 | 4.76E+09 | 5.32E+09 |
| <b>i12<sub>bd</sub></b> | <b>p11<sub>bd</sub></b> | 3.10E+11 | 3.23E+11 | 3.36E+11 | 3.51E+11 | 3.64E+11 | 3.83E+11 |
| <b>i14<sub>bd</sub></b> | <b>i16<sub>bd</sub></b> | 3.81E+10 | 4.12E+10 | 4.44E+10 | 4.79E+10 | 5.16E+10 | 5.65E+10 |
| <b>i16<sub>bd</sub></b> | <b>i14<sub>bd</sub></b> | 3.23E+08 | 3.49E+08 | 3.78E+08 | 4.09E+08 | 4.41E+08 | 4.84E+08 |
| <b>i16<sub>bd</sub></b> | <b>i15<sub>bd</sub></b> | 2.06E+08 | 2.17E+08 | 2.30E+08 | 2.43E+08 | 2.56E+08 | 2.74E+08 |
| <b>i15<sub>bd</sub></b> | <b>i16<sub>bd</sub></b> | 8.57E+10 | 9.08E+10 | 9.61E+10 | 1.02E+11 | 1.07E+11 | 1.15E+11 |
| <b>i16<sub>bd</sub></b> | <b>p4<sub>bd</sub></b>  | 9.21E+09 | 1.03E+10 | 1.16E+10 | 1.29E+10 | 1.44E+10 | 1.65E+10 |
| <b>i7<sub>bd</sub></b>  | <b>i4<sub>bd</sub></b>  | 9.74E+10 | 1.04E+11 | 1.10E+11 | 1.17E+11 | 1.23E+11 | 1.32E+11 |
| <b>i4<sub>bd</sub></b>  | <b>i7<sub>bd</sub></b>  | 3.61E+10 | 3.72E+10 | 3.83E+10 | 3.94E+10 | 4.05E+10 | 4.18E+10 |
| <b>i7<sub>bd</sub></b>  | <b>i10<sub>bd</sub></b> | 6.15E+07 | 6.89E+07 | 7.70E+07 | 8.59E+07 | 9.57E+07 | 1.09E+08 |
| <b>i10<sub>bd</sub></b> | <b>i7<sub>bd</sub></b>  | 1.09E+12 | 1.13E+12 | 1.17E+12 | 1.21E+12 | 1.25E+12 | 1.30E+12 |
| <b>i3<sub>bd</sub></b>  | <b>i4<sub>bd</sub></b>  | 1.02E+09 | 1.15E+09 | 1.30E+09 | 1.46E+09 | 1.63E+09 | 1.88E+09 |
| <b>i4<sub>bd</sub></b>  | <b>i3<sub>bd</sub></b>  | 5.74E+05 | 6.83E+05 | 8.09E+05 | 9.55E+05 | 1.12E+06 | 1.37E+06 |
| <b>i3<sub>bd</sub></b>  | <b>i13<sub>bd</sub></b> | 2.78E+07 | 3.24E+07 | 3.76E+07 | 4.35E+07 | 5.00E+07 | 5.93E+07 |
| <b>i3<sub>bd</sub></b>  | <b>i5<sub>bd</sub></b>  | 9.08E+05 | 1.15E+06 | 1.43E+06 | 1.78E+06 | 2.17E+06 | 2.76E+06 |
| <b>i5<sub>bd</sub></b>  | <b>i3<sub>bd</sub></b>  | 1.29E+08 | 1.60E+08 | 1.97E+08 | 2.40E+08 | 2.91E+08 | 3.68E+08 |
| <b>i4<sub>bd</sub></b>  | <b>p9<sub>bd</sub></b>  | 4.76E+07 | 5.69E+07 | 6.79E+07 | 8.05E+07 | 9.54E+07 | 1.17E+08 |
| <b>i9<sub>bd</sub></b>  | <b>i13<sub>bd</sub></b> | 8.82E+09 | 1.02E+10 | 1.16E+10 | 1.32E+10 | 1.50E+10 | 1.73E+10 |
| <b>i13<sub>bd</sub></b> | <b>i9<sub>bd</sub></b>  | 2.85E+06 | 3.91E+06 | 5.29E+06 | 7.06E+06 | 9.30E+06 | 1.30E+07 |
| <b>i9<sub>bd</sub></b>  | <b>p7<sub>bd</sub></b>  | 1.16E+09 | 1.78E+09 | 2.64E+09 | 3.79E+09 | 5.30E+09 | 7.84E+09 |
| <b>i13<sub>bd</sub></b> | <b>i17<sub>bd</sub></b> | 1.06E+11 | 1.17E+11 | 1.28E+11 | 1.40E+11 | 1.52E+11 | 1.69E+11 |
| <b>i17<sub>bd</sub></b> | <b>i13<sub>bd</sub></b> | 3.90E+04 | 4.65E+04 | 5.52E+04 | 6.52E+04 | 7.68E+04 | 9.38E+04 |
| <b>i17<sub>bd</sub></b> | <b>p1<sub>bd</sub></b>  | 2.46E+09 | 2.75E+09 | 3.06E+09 | 3.38E+09 | 3.75E+09 | 4.25E+09 |
| <b>i17<sub>bd</sub></b> | <b>p2<sub>bd</sub></b>  | 4.90E+10 | 5.39E+10 | 5.92E+10 | 6.47E+10 | 7.09E+10 | 7.91E+10 |
| <b>i17<sub>bd</sub></b> | <b>p3<sub>bd</sub></b>  | 4.06E+09 | 4.57E+09 | 5.12E+09 | 5.76E+09 | 6.40E+09 | 7.33E+09 |
| <b>i17<sub>bd</sub></b> | <b>p4<sub>bd</sub></b>  | 3.53E+09 | 4.01E+09 | 4.57E+09 | 5.15E+09 | 5.82E+09 | 6.75E+09 |
